# Supplementary material for: Preclinical Evaluation of Long-Acting Emtricitabine Semi-Solid Prodrug Nanoparticle Formulations
Source: MDPI journal article supplement (doi:10.3390/pharmaceutics15071835), 2023-06-27
Supplement: s1 [file s1]

|         |          | Intra-day            |                          |                           | Inter-day            |                          |                           |
|---------|----------|----------------------|--------------------------|---------------------------|----------------------|--------------------------|---------------------------|
|         |          | Average ± SD (ng/mL) | Variance of accuracy (%) | Variance of precision (%) | Average ± SD (ng/mL) | Variance of accuracy (%) | Variance of precision (%) |
| Assay 1 | 5ng/mL   | 4.5 ±0.23            | -10.4                    | 5.1                       | 4.7 ±0.64            | -6.3                     | 13.6                      |
|         | 200ng/mL | 193.7 ±7.26          | -3.2                     | 3.8                       | 191.82 ±11.05        | -4.1                     | 5.8                       |
|         | 400ng/mL | 388.3 ±9.09          | -2.9                     | 2.3                       | 386.8 ±6.23          | -3.3                     | 1.6                       |
| Assay 2 | 5ng/mL   | 4.2 ± 0.19           | -16.4                    | 4.6                       |                      |                          |                           |
|         | 200ng/mL | 180.0 ±2.83          | -10.2                    | 1.6                       |                      |                          |                           |
|         | 400ng/mL | 380.0 ±7.60          | -5.0                     | 2.0                       |                      |                          |                           |
| Assay 3 | 5ng/mL   | 5.4 ±0.30            | 8.0                      | 5.5                       |                      |                          |                           |
|         | 200ng/mL | 201.8 ±4.91          | 0.9                      | 2.4                       |                      |                          |                           |
|         | 400ng/mL | 392.2 ±12.83         | -2.0                     | 3.3                       |                      |                          |                           |

**Table S1** shows the intra-assay variance in accuracy and precision of 3 repetitions of the assay. Also shown is the variance in accuracy and precision of the inter-day assay performance. Accuracy and precision were assessed in triplicate at 3 levels (low (5ng/mL), medium (200ng/mL) and high (400ng/mL))

| Figure | MW_Test_group | Challenge | Tissue | Days_Post_Inj | MW_test            | p.value | bonf.p.value |
|--------|---------------|-----------|--------|---------------|--------------------|---------|--------------|
| 4A     | 1             | 7         | Plasma | 14            | Untreated_vs_SDN9  | 0.002   | 0.006        |
| 4A     | 1             | 7         | Plasma | 14            | Untreated_vs_SDN10 | 0.002   | 0.006        |
| 4A     | 1             | 7         | Plasma | 14            | SDN10_vs_SDN9      | 1.000   | 3.000        |
| 4B     | 2             | 7         | Plasma | 28            | Untreated_vs_SDN9  | 0.002   | 0.006        |
| 4B     | 2             | 7         | Plasma | 28            | Untreated_vs_SDN10 | 0.002   | 0.006        |
| 4B     | 2             | 7         | Plasma | 28            | SDN10_vs_SDN9      | 1.000   | 3.000        |
| 5A     | 3             | 7         | Spleen | 28            | Untreated_vs_SDN9  | 0.002   | 0.006        |
| 5A     | 3             | 7         | Spleen | 28            | Untreated_vs_SDN10 | 0.002   | 0.006        |
| 5A     | 3             | 7         | Spleen | 28            | SDN10_vs_SDN9      | 1.000   | 3.000        |
| 5B     | 4             | 7         | lung   | 28            | Untreated_vs_SDN9  | 0.002   | 0.006        |
| 5B     | 4             | 7         | lung   | 28            | Untreated_vs_SDN10 | 0.002   | 0.006        |
| 5B     | 4             | 7         | lung   | 28            | SDN10_vs_SDN9      | 1.000   | 3.000        |
| 5C     | 5             | 7         | Liver  | 28            | Untreated_vs_SDN9  | 0.001   | 0.002        |
| 5C     | 5             | 7         | Liver  | 28            | Untreated_vs_SDN10 | 0.001   | 0.002        |
| 5C     | 5             | 7         | Liver  | 28            | SDN10_vs_SDN9      | 1.000   | 3.000        |
| 4C     | 6             | 14        | Plasma | 14            | Untreated_vs_SDN9  | 0.003   | 0.008        |
| 4C     | 6             | 14        | Plasma | 14            | Untreated_vs_SDN10 | 0.040   | 0.119        |
| 4C     | 6             | 14        | Plasma | 14            | SDN10_vs_SDN9      | 0.070   | 0.210        |
| 4D     | 7             | 14        | Plasma | 28            | Untreated_vs_SDN9  | 0.003   | 0.008        |
| 4D     | 7             | 14        | Plasma | 28            | Untreated_vs_SDN10 | 0.024   | 0.073        |
| 4D     | 7             | 14        | Plasma | 28            | SDN10_vs_SDN9      | 0.027   | 0.080        |
| 5D     | 8             | 14        | Spleen | 28            | Untreated_vs_SDN9  | 0.003   | 0.008        |
| 5D     | 8             | 14        | Spleen | 28            | Untreated_vs_SDN10 | 0.448   | 1.343        |

|    |    |    |        |    |                    |       |       |
|----|----|----|--------|----|--------------------|-------|-------|
| 5D | 8  | 14 | Spleen | 28 | SDN10_vs_SDN9      | 0.027 | 0.080 |
| 5E | 9  | 14 | lung   | 28 | Untreated_vs_SDN9  | 0.003 | 0.008 |
| 5E | 9  | 14 | lung   | 28 | Untreated_vs_SDN10 | 0.552 | 1.655 |
| 5E | 9  | 14 | lung   | 28 | SDN10_vs_SDN9      | 0.009 | 0.028 |
| 5F | 10 | 14 | Liver  | 28 | Untreated_vs_SDN9  | 0.003 | 0.008 |
| 5F | 10 | 14 | Liver  | 28 | Untreated_vs_SDN10 | 0.500 | 1.500 |
| 5F | 10 | 14 | Liver  | 28 | SDN10_vs_SDN9      | 0.009 | 0.028 |

**Table S2** Differences in viral load in plasma and tissues at timepoints 14 and 28 days following challenge 7 or 14 days after dosing of SDN9, SDN10 or control/no treatment, were tested for significance using a one-sided, pairwise Mann-Whitney-Wilcoxon test, with Bonferroni correction factor of 3 (for 3 pairwise comparison tests per challenge/tissue/timepoint group).
